# Supplementary material
Source: Springer Nature journal article supplement (https://mijn.bsl.nl/resource/supplementary/13047_2011_346_MOESM1_ESM.pdf/7110612)

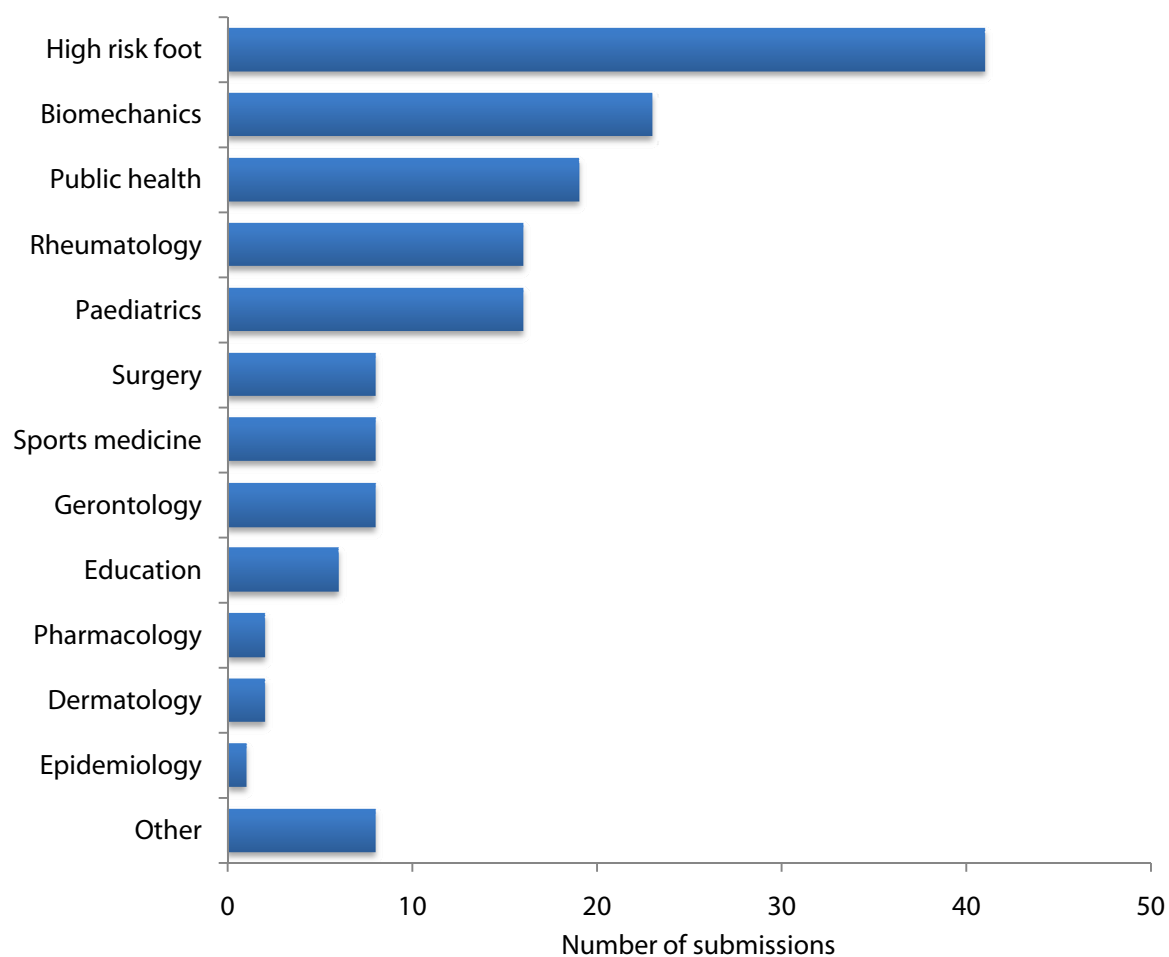

Supplement: MOESM1 [file 7110612]
